# Supplementary material for: Facile solution deposition of ZnIn2S4 nanosheet films on FTO substrates for photoelectric application
Source: Royal Society of Chemistry journal article supplement (doi:10.1039/c0nr00955e), 2011-01-01
Supplement: c0nr00955e.pdf [file c0nr00955e.pdf]

## Electronic Supplementary Information (ESI)

### Facile solution deposition of $\text{ZnIn}_2\text{S}_4$ nanosheet films on FTO substrates for photoelectric application

Shengjie Peng,<sup>a</sup> Peining Zhu,<sup>b</sup> Velmurugan Thavasi,<sup>c</sup> Subodh G. Mhaisalkar<sup>a</sup>, Seeram Ramakrishna<sup>\*cd</sup>

<sup>a</sup> School of Materials Science and Engineering, Nanyang Technological University, 50 Nanyang Avenue, Singapore 639798

<sup>b</sup> Mechanical Engineering, National University of Singapore, Singapore 117576

<sup>c</sup> NUS Nanoscience and Nanotechnology Initiative, National University of Singapore, Singapore 117576

<sup>d</sup> King Saud University, KSA. P.O. Box 2455, Riyadh, Saudi Arabia.

E-mail address: [mpesr@nus.edu.sg](mailto:mpesr@nus.edu.sg).

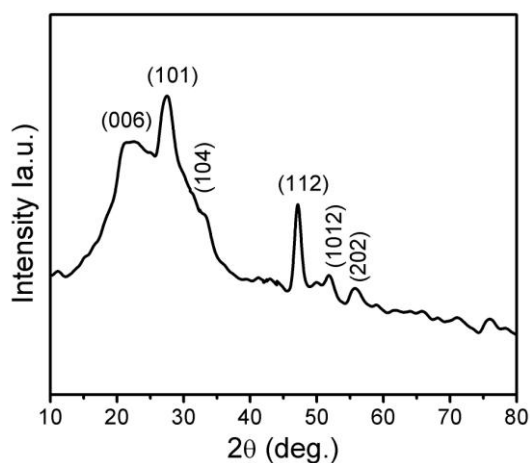

Fig. S1 XRD pattern of the  $\text{ZnIn}_2\text{S}_4$  precipitant product at the bottom of the autoclave.

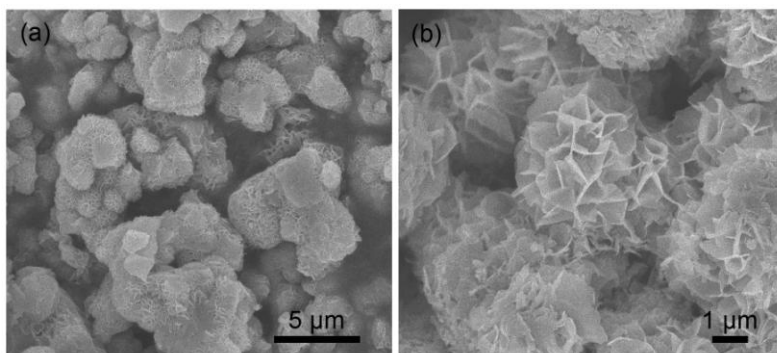

Fig. S2 SEM image (a) and the magnified part (b) of the  $\text{ZnIn}_2\text{S}_4$  precipitant product at the bottom of the autoclave.

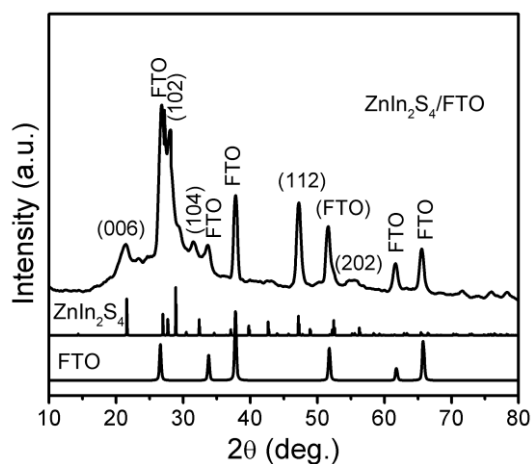

Fig. S3 XRD pattern of the ZnIn<sub>2</sub>S<sub>4</sub> film on the FTO substrate after heat treatment at 400 °C for 30 min in an Ar atmosphere.

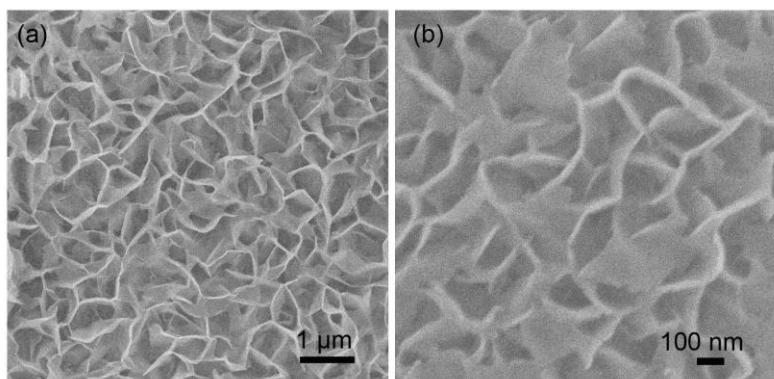

Fig. S4 SEM image (a) and the magnified part (b) of the ZnIn<sub>2</sub>S<sub>4</sub> film on the FTO substrate after heat treatment at 400 °C for 30 min in an Ar atmosphere.

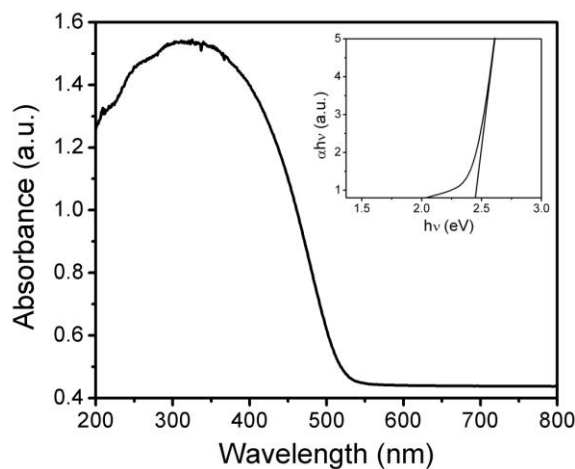

Fig. S5 UV-vis spectra of the ZnIn<sub>2</sub>S<sub>4</sub> film on FTO substrates after heat treatment at 400 °C for 30 min in an Ar atmosphere. The inset is the corresponding  $(\alpha h\nu)^2$  vs.  $h\nu$  curve.
